# Supplementary material for: Real-time Metagenomic Analysis of Undiagnosed Fever Cases Unveils a Yellow Fever Outbreak in Edo State, Nigeria
Source: PubMed Central journal article supplement (PMC7035389; doi:10.1038/s41598-020-59880-w), 2020-02-21
Supplement: 41598_2020_59880_MOESM1_ESM.pdf [file 41598_2020_59880_MOESM1_ESM.pdf]

# Real-time Metagenomic Analysis of Undiagnosed Fever Cases Unveils a Yellow Fever Outbreak in Edo State, Nigeria

Fehintola V. Ajogbasile<sup>1,2,\*</sup>, Judith U. Oguzie<sup>1,2\*</sup>, Paul E. Oluniyi<sup>1,2\*</sup>, Philomena E. Eromon<sup>1\*</sup>,  
Jessica N. Uwanibe<sup>1,2\*</sup>, Samar B. Mehta<sup>3,4</sup>, Katherine J. Siddle<sup>3,5</sup>, Ikponmwosa Odia<sup>6</sup>, Sarah  
M. Winnicki<sup>3</sup>, Nosa Akpede<sup>6</sup>, George Akpede<sup>6</sup>, Sylvanus Okogbenin<sup>6</sup>, Ephraim  
Ogbaini-Emovon<sup>6</sup>, Bronwyn L. MacInnis<sup>3,7</sup>, Onikepe A. Folarin<sup>1,2</sup>, Kayvon Modjarrad<sup>8</sup>, Stephen  
F. Schaffner<sup>3,5,7</sup>, Oyewale Tomori<sup>1</sup>, Chikwe Ihekweazu<sup>9</sup>, Pardis C. Sabeti<sup>3,5,7,10</sup>, Christian T.  
Happi<sup>1,2,6,7,\*\*</sup>

1. African Centre of Excellence for Genomics of Infectious Diseases (ACEGID), Redeemer's University, Ede, Osun State, Nigeria. 2. Department of Biological Sciences, Faculty of Natural Sciences, Redeemer's University, Ede, Osun State, Nigeria. 3. Broad Institute of MIT and Harvard, Cambridge, Massachusetts, USA. 4. Beth Israel Deaconess Medical Center, Division of Infectious Diseases, Boston, Massachusetts, USA. 5. Center for Systems Biology, Department of Organismic and Evolutionary Biology, Harvard University, Cambridge, Massachusetts, USA. 6. Institute of Lassa Fever Research and Control, Irrua Specialist Teaching Hospital, Irrua, Edo State, Nigeria. 7. Department of Immunology and Infectious Diseases, Harvard T.H. Chan School of Public Health, Harvard University, Boston, Massachusetts, USA. 8. Emerging Infectious Diseases Branch, Walter Reed Army Institute of Research, Silver Spring, MD, USA. 9. Nigeria Center for Disease Control, Abuja, Nigeria. 10. Howard Hughes Medical Institute, Chevy Chase, Maryland, USA.

\*These authors contributed equally, \*\*Corresponding author: [happic@run.edu.ng](mailto:happic@run.edu.ng)



| Sample ID | GenBank accession # | YFV RT-qPCR C <sub>t</sub> (cycles) | Estimated YFV RT-qPCR concentration (copies/μl) | YFV deduplicated read pairs aligned | Total read pairs sequenced |
|-----------|---------------------|-------------------------------------|-------------------------------------------------|-------------------------------------|----------------------------|
| 0693‡     | MN211306            | 21.85                               | 533000                                          | 555703                              | 1974510                    |
| 1060‡     | MN211311            | 30.73                               | 8150                                            | 36206                               | 808444                     |
| 1082‡     | MN211301            | 31.03                               | 7118                                            | 37011                               | 1850149                    |
| 0959‡     | MN211302            | 34.12                               | 1626                                            | 1873                                | 596360                     |
| 0858‡     | MN211304            | 31.97                               | 3968                                            | 2154                                | 1771347                    |
| 0418‡     | MN211309            | 30.29                               | 1609                                            | 3067                                | 813891                     |
| 0054‡*    | pending             | 26.15                               | 16526                                           | <b>2379*</b>                        | 1212206                    |
| 0410‡     | MN211310            | 26.32                               | 14944                                           | 3041                                | 2353001                    |
| 0652‡     | MN211307            | 32.85                               | 2584                                            | 479                                 | 3463575                    |
| 0336‡     | MK457700            | 34.72                               | 247                                             | 568                                 | 2028788                    |
| 0487†     | MK457702            | 35.62                               | 147                                             | 138                                 | 653380                     |
| 0692      |                     | 36.18                               | 523                                             | 79                                  | 1822472                    |
| 0486‡     | MN211308            | 25.06                               | 31800                                           | 808                                 | 5113134                    |
| 0816‡     | MN211305            | 30.40                               | 8476                                            | 805                                 | 740066                     |
| 0552†     | MK457703            | 35.02                               | 212                                             | 203                                 | 802365                     |
| 0898‡     | MN211303            | 29.43                               | 13552                                           | 455                                 | 2913828                    |
| 0450      |                     | 33.94                               | 388                                             | 46                                  | 651410                     |
| 0500      |                     | 30.46                               | 1267                                            | 139                                 | 1147117                    |
| 0323      |                     | 34.05                               | 154                                             | 62                                  | 1339359                    |
| 0576      |                     | 30.11                               | 1542                                            | 87                                  | 1862063                    |
| 0337      |                     | 25.57                               | 23380                                           | 48                                  | 2759890                    |
| 0482      |                     | 31.72                               | 594                                             | 21                                  | 1229711                    |
| 0832      |                     | 36.54                               | 437                                             | 1                                   | 1882812                    |

|      |  |       |      |    |         |
|------|--|-------|------|----|---------|
| 0979 |  | 35.23 | 956  | 6  | 1733372 |
| 1158 |  | 35.28 | 935  | 5  | 2241764 |
| 0923 |  | 33.67 | 2016 | 1  | 2522614 |
| 1077 |  | 36.90 | 436  | 2  | 1813794 |
| 0931 |  | 31.62 | 5372 | 0  | 2692537 |
| 1207 |  | 36.38 | 557  | 0  | 2345025 |
| NTC1 |  | -     | -    | 0  | 365834  |
| NTC2 |  | -     | -    | 0  | 457056  |
| NTC3 |  | -     | -    | 0  | 557561  |
| NTC4 |  | -     | -    | 0  | 25994   |
| NTC5 |  | -     | -    | 88 | 38939   |
| NTC6 |  | -     | -    | 0  | 460467  |

‡: complete genome assembled; †: partial genome assembled.

\* Sample ID 0054 was initially positive by qPCR with a  $C_t$  of 26. The same sample subsequently showed 2379 unique reads that mapped to YFV. As discussed in the main text, we excluded it from further phylogenetic analysis due to possible contamination with the negative control in its batch (NTC5 above, 88 unique reads mapping to YFV).
